# Supplementary material for: Structure-based virtual screening and ADME/T-based profiling for low molecular weight chemical starting points as p21-activated kinase 4 inhibitors
Source: Royal Society of Chemistry journal article supplement (doi:10.1039/c4ra16963h), 2015-01-01
Supplement: c4ra16963h1.pdf [file c4ra16963h1.pdf]

## Supporting Information

**Table S1.** Physicochemical properties of the twenty-seven hit compounds.

| Compound | SPECS ID        | AlogP | MW <sup>a</sup> | N_A <sup>b</sup> | N_D <sup>c</sup> | N_RB <sup>d</sup> | PSA <sup>e</sup> |
|----------|-----------------|-------|-----------------|------------------|------------------|-------------------|------------------|
| 1        | AE-848/32734039 | 2.76  | 314.3           | 5                | 1                | 5                 | 101.22           |
| 2        | AG-205/37106132 | 1.00  | 277.3           | 5                | 2                | 5                 | 139.52           |
| 3        | AG-205/37007270 | 0.50  | 399.5           | 7                | 1                | 4                 | 121.95           |
| 4        | AG-205/36590056 | 4.17  | 238.2           | 4                | 2                | 8                 | 124.63           |
| 5        | AG-690/11240073 | 0.63  | 284.2           | 6                | 1                | 2                 | 115.96           |
| 6        | AO-081/41934562 | 1.62  | 338.4           | 4                | 2                | 5                 | 107.29           |
| 7        | AO-008/13599001 | 4.17  | 470.1           | 8                | 4                | 7                 | 198.83           |
| 8        | AN-329/43449414 | 1.49  | 338.4           | 4                | 2                | 3                 | 123.12           |
| 9        | AO-854/43450565 | 3.87  | 331.3           | 5                | 1                | 5                 | 76.06            |
| 10       | AO-080/43441552 | 4.35  | 211.2           | 4                | 1                | 4                 | 116.04           |
| 11       | AK-968/15606187 | 3.54  | 335.3           | 4                | 1                | 3                 | 116.04           |
| 12       | AF-399/15539023 | 4.51  | 297.3           | 5                | 2                | 5                 | 105.48           |
| 13       | AN-465/15280004 | 1.89  | 219.2           | 3                | 2                | 3                 | 64.68            |
| 14       | AP-906/41641275 | 4.89  | 359.4           | 5                | 1                | 3                 | 78.27            |
| 15       | AH-979/40711131 | 0.94  | 286.3           | 2                | 3                | 3                 | 70.22            |
| 16       | AP-685/41280834 | 0.99  | 394.2           | 5                | 2                | 9                 | 76.82            |
| 17       | AN-465/42889348 | 0.12  | 315.8           | 5                | 2                | 10                | 82.81            |
| 18       | AG-205/40650398 | 5.39  | 327.4           | 4                | 1                | 5                 | 68.9             |
| 19       | AK-968/12268011 | -1.88 | 375.3           | 5                | 2                | 5                 | 81.78            |
| 20       | AP-906/42708958 | 3.32  | 408.5           | 4                | 0                | 4                 | 45.4             |
| 21       | AP-906/42712578 | 4.92  | 367.4           | 3                | 1                | 5                 | 63.78            |
| 22       | AG-690/10769052 | 1.73  | 347.4           | 5                | 2                | 3                 | 106.84           |
| 23       | AM-807/14146364 | 3.76  | 359.8           | 5                | 1                | 4                 | 78.35            |
| 24       | AP-970/42897159 | 2.08  | 387.9           | 7                | 1                | 10                | 80.75            |
| 25       | AP-853/41701196 | 2.44  | 398.9           | 8                | 3                | 7                 | 160.1            |
| 26       | AK-778/43420882 | 1.44  | 449.89          | 5                | 2                | 6                 | 134              |
| 27       | AN-465/43411003 | 3.05  | 282.34          | 4                | 3                | 9                 | 89.37            |

<sup>a</sup>MW, Molecular Weight.

<sup>b</sup>N\_A, Number of H-bond Acceptors.

<sup>c</sup>N\_D, Number of H-bond Donors.

<sup>d</sup>N\_RB, Number of Rotatable Bonds.

<sup>e</sup>PSA, Molecular\_Polar Surface Area.

**Table S2.** Pharmacophore mapping fit values and docked binding affinities of the twenty-seven hit compounds.

| Compounds | Fit Value |         | Relative Energy |           | Predicted average - log (Kd) <sup>a</sup> | Predicted binding energy (kcal/mol) <sup>b</sup> |
|-----------|-----------|---------|-----------------|-----------|-------------------------------------------|--------------------------------------------------|
|           | Pharm1    | Pharm2  | Pharm1          | Pharm2    |                                           |                                                  |
| <b>1</b>  | 2.68074   | 2.69667 | 7.8603          | 8.72842   | 6.04                                      | -8.24                                            |
| <b>2</b>  | 2.92045   | 2.50669 | 3.64374         | 2.76788   | 5.10                                      | -6.96                                            |
| <b>3</b>  | 2.59787   | 2.4223  | 6.84827         | 5.35376   | 5.06                                      | -6.91                                            |
| <b>4</b>  | 3.10679   | 3.13729 | 8.20731         | 1.27786   | 6.55                                      | -8.94                                            |
| <b>5</b>  | 2.60017   | 1.96304 | 1.59365         | 0.756621  | 5.48                                      | -7.47                                            |
| <b>6</b>  | 3.31914   | 2.8848  | 6.80285         | 11.3397   | 6.05                                      | -8.26                                            |
| <b>7</b>  | 2.56844   | 1.99965 | 17.3547         | 4.07524   | 5.07                                      | -6.91                                            |
| <b>8</b>  | 2.84084   | 2.8166  | 7.77097         | 5.30931   | 5.52                                      | -7.53                                            |
| <b>9</b>  | 3.48288   | 2.91874 | 17.4011         | 17.9902   | 6.49                                      | -8.86                                            |
| <b>10</b> | 3.34258   | 2.89784 | 11.7986         | 8.62182   | 6.12                                      | -8.34                                            |
| <b>11</b> | 3.23238   | 2.86055 | 5.87323         | 8.51512   | 5.86                                      | -7.99                                            |
| <b>12</b> | 2.8446    | 2.96117 | 4.91806         | 6.06724   | 6.05                                      | -8.25                                            |
| <b>13</b> | 2.92843   | 2.89537 | 9.50878         | 6.0475    | 6.16                                      | -8.41                                            |
| <b>14</b> | 2.92465   | 3.1769  | 9.34371         | 6.11616   | 6.29                                      | -8.58                                            |
| <b>15</b> | 2.4861    | 2.70236 | 18.9617         | 3.5329    | 5.37                                      | -7.33                                            |
| <b>16</b> | 2.97101   | 2.72914 | 7.42589         | 8.41023   | 4.68                                      | -6.39                                            |
| <b>17</b> | 2.95171   | 2.83277 | 11.5225         | 8.08934   | 4.70                                      | -6.41                                            |
| <b>18</b> | 2.77815   | 2.9218  | 9.90153         | 7.35985   | 6.14                                      | -8.38                                            |
| <b>19</b> | 2.91782   | 2.30294 | 4.98644         | 10.0942   | 4.72                                      | -6.44                                            |
| <b>20</b> | 2.44603   | 2.15889 | 8.4663          | 0.0181385 | 5.93                                      | -8.09                                            |
| <b>21</b> | 2.95468   | 2.83561 | 3.61977         | 6.05434   | 5.66                                      | -7.72                                            |
| <b>22</b> | 2.80343   | 2.85461 | 8.95141         | 8.73511   | 5.43                                      | -7.40                                            |
| <b>23</b> | 2.72763   | 2.9831  | 4.96761         | 3.15217   | 6.39                                      | -8.71                                            |
| <b>24</b> | 2.86334   | 2.92987 | 9.69933         | 6.68367   | 5.66                                      | -7.71                                            |
| <b>25</b> | 3.47708   | 3.02276 | 4.19222         | 3.97714   | 5.92                                      | -8.07                                            |
| <b>26</b> | 3.47071   | 2.95574 | 8.00741         | 7.48183   | 5.95                                      | -8.12                                            |
| <b>27</b> | 2.96498   | 2.86494 | 10.2645         | 9.34114   | 6.24                                      | -8.51                                            |

<sup>a</sup> The predicted activity values by XSCORE function.

<sup>b</sup> The predicted activity values by GlideScore function scores in Schrödinger suite.
